# Supplementary material for: Conservation genomics and pollination biology of an endangered, edaphic-endemic, octoploid herb: El Dorado bedstraw (Galium californicum subsp. sierrae; Rubiaceae)
Source: PeerJ. 2020 Oct 26;8:e10042. doi: 10.7717/peerj.10042 (PMC7594638; doi:10.7717/peerj.10042)
Supplement: Supplemental Information 1 — Data on samples of Galium, including (where relevant) sample code, locale name, transect position (m from start of transect), latitude, longitude, sex, and date collected. Latitude and longitude are in the WGS84 datum. [file peerj-08-10042-s001.xlsx]

## Sheet: SAMPLING
SAMPLE CODE	TAXON	LOCALE NAME	TRANSECT POSITION	LATITUDE	LONGITUDE	SEX	DATE COLLECTED
2233	Galium porrigens var. tenue	Kanaka Valley	N/A	38.7479	-121.023	Not Recorded	19 Mar 2017
2237	Galium porrigens var. porrigens	Rocky Oaks Dam	N/A	34.1002	-118.813	Not Recorded	3 Apr 2017
2240	Galium andrewsii subsp. andrewsii	Rocky Oaks Dam	N/A	34.1002	-118.813	Not Recorded	8 Apr 2017
2246	Galium andrewsii subsp. andrewsii	Camino Cielo Road	N/A	34.5009	-119.733	Not Recorded	25 Apr 2017
2247	Galium californicum	Camino Cielo Road	N/A	34.4944	-119.714	Not Recorded	25 Apr 2017
2249	Galium nuttallii subsp. insulare	Santa Cruz Island	N/A	34.0177	-119.873	Not Recorded	27 Apr 2017
2251	Galium californicum subsp. flaccidum	Santa Cruz Island	N/A	34.0167	-119.81	Not Recorded	28 Apr 2017
2253	Galium angustifolium subsp. foliosum	Santa Cruz Island	N/A	34.0167	-119.872	Not Recorded	28 Apr 2017
2261	Galium andrewsii subsp. andrewsii	Dry Lakes Ridge	N/A	34.5427	-119.241	Not Recorded	1 May 2017
2262	Galium bolanderi	Meder Road	N/A	38.6782	-120.971	Not Recorded	3 May 2017
2277	Galium californicum subsp. primum	Alvin Meadows	N/A	33.7381	-116.752	Not Recorded	20 May 2017
2278	Galium californicum subsp. primum	Pine Cove	N/A	33.7558	-116.757	Not Recorded	20 May 2017
2260_1	Galium californicum subsp. sierrae	Cameron Park	6.38841	38.6782	-120.971	Female	3 May 2017
2260_10	Galium californicum subsp. sierrae	Cameron Park	39.7503	38.6782	-120.971	Male	3 May 2017
2260_11	Galium californicum subsp. sierrae	Cameron Park	41.4862	38.6782	-120.971	Male	3 May 2017
2260_12	Galium californicum subsp. sierrae	Cameron Park	49.3837	38.6782	-120.971	Female	3 May 2017
2260_2	Galium californicum subsp. sierrae	Cameron Park	13.7139	38.6782	-120.971	Female	3 May 2017
2260_3	Galium californicum subsp. sierrae	Cameron Park	14.2156	38.6782	-120.971	Female	3 May 2017
2260_4	Galium californicum subsp. sierrae	Cameron Park	14.9095	38.6782	-120.971	Male	3 May 2017
2260_5	Galium californicum subsp. sierrae	Cameron Park	14.9764	38.6782	-120.971	Female	3 May 2017
2260_6	Galium californicum subsp. sierrae	Cameron Park	15.6211	38.6782	-120.971	Female	3 May 2017
2260_7	Galium californicum subsp. sierrae	Cameron Park	22.4933	38.6782	-120.971	Male	3 May 2017
2260_8	Galium californicum subsp. sierrae	Cameron Park	26.4113	38.6782	-120.971	Female	3 May 2017
2260_9	Galium californicum subsp. sierrae	Cameron Park	33.9885	38.6782	-120.971	Female	3 May 2017
2263_1	Galium californicum subsp. sierrae	Tiffany Hill	4	38.7212	-120.962	Male	3 May 2017
2263_10	Galium californicum subsp. sierrae	Tiffany Hill	36	38.7212	-120.962	Female	3 May 2017
2263_11	Galium californicum subsp. sierrae	Tiffany Hill	43	38.7212	-120.962	Male	3 May 2017
2263_12	Galium californicum subsp. sierrae	Tiffany Hill	50	38.7212	-120.962	Male	3 May 2017
2263_2	Galium californicum subsp. sierrae	Tiffany Hill	7	38.7212	-120.962	Male	3 May 2017
2263_3	Galium californicum subsp. sierrae	Tiffany Hill	8	38.7212	-120.962	Male	3 May 2017
2263_4	Galium californicum subsp. sierrae	Tiffany Hill	29	38.7212	-120.962	Female	3 May 2017
2263_5	Galium californicum subsp. sierrae	Tiffany Hill	30	38.7212	-120.962	Female	3 May 2017
2263_6	Galium californicum subsp. sierrae	Tiffany Hill	31	38.7212	-120.962	Female	3 May 2017
2263_7	Galium californicum subsp. sierrae	Tiffany Hill	34	38.7212	-120.962	Male	3 May 2017
2263_8	Galium californicum subsp. sierrae	Tiffany Hill	34	38.7212	-120.962	Male	3 May 2017
2263_9	Galium californicum subsp. sierrae	Tiffany Hill	35	38.7212	-120.962	Female	3 May 2017
2264_1	Galium californicum subsp. sierrae	Farview	4.52375	38.7317	-120.994	Female	3 May 2017
2264_10	Galium californicum subsp. sierrae	Farview	36.6996	38.7317	-120.994	Female	3 May 2017
2264_11	Galium californicum subsp. sierrae	Farview	41.5488	38.7317	-120.994	Female	3 May 2017
2264_12	Galium californicum subsp. sierrae	Farview	41.5994	38.7317	-120.994	Female	3 May 2017
2264_2	Galium californicum subsp. sierrae	Farview	5.32136	38.7317	-120.994	Female	3 May 2017
2264_3	Galium californicum subsp. sierrae	Farview	11.2567	38.7317	-120.994	Female	3 May 2017
2264_4	Galium californicum subsp. sierrae	Farview	12.3022	38.7317	-120.994	Female	3 May 2017
2264_5	Galium californicum subsp. sierrae	Farview	18.6172	38.7317	-120.994	Male	3 May 2017
2264_6	Galium californicum subsp. sierrae	Farview	23.3789	38.7317	-120.994	Male	3 May 2017
2264_7	Galium californicum subsp. sierrae	Farview	25.3557	38.7317	-120.994	Male	3 May 2017
2264_8	Galium californicum subsp. sierrae	Farview	26.36	38.7317	-120.994	Male	3 May 2017
2264_9	Galium californicum subsp. sierrae	Farview	31.0487	38.7317	-120.994	Male	3 May 2017
2272_1	Galium californicum subsp. sierrae	Pine Hill	6.23833	38.7214	-120.989	Male	11 May 2017
2272_10	Galium californicum subsp. sierrae	Pine Hill	36	38.7214	-120.989	Female	11 May 2017
2272_11	Galium californicum subsp. sierrae	Pine Hill	45	38.7214	-120.989	Female	11 May 2017
2272_12	Galium californicum subsp. sierrae	Pine Hill	49	38.7214	-120.989	Female	11 May 2017
2272_2	Galium californicum subsp. sierrae	Pine Hill	8.33999	38.7214	-120.989	Female	11 May 2017
2272_3	Galium californicum subsp. sierrae	Pine Hill	11.9462	38.7214	-120.989	Female	11 May 2017
2272_4	Galium californicum subsp. sierrae	Pine Hill	12.8532	38.7214	-120.989	Male	11 May 2017
2272_5	Galium californicum subsp. sierrae	Pine Hill	19.6937	38.7214	-120.989	Female	11 May 2017
2272_6	Galium californicum subsp. sierrae	Pine Hill	27.036	38.7214	-120.989	Female	11 May 2017
2272_7	Galium californicum subsp. sierrae	Pine Hill	30.1961	38.7214	-120.989	Female	11 May 2017
2272_8	Galium californicum subsp. sierrae	Pine Hill	31.202	38.7214	-120.989	Female	11 May 2017
2272_9	Galium californicum subsp. sierrae	Pine Hill	35.6274	38.7214	-120.989	Female	11 May 2017
2274_1	Galium californicum subsp. sierrae	Lazy Knoll	4	38.7294	-120.98	Male	11 May 2017
2274_10	Galium californicum subsp. sierrae	Lazy Knoll	47	38.7294	-120.98	Male	11 May 2017
2274_11	Galium californicum subsp. sierrae	Lazy Knoll	48	38.7294	-120.98	Female	11 May 2017
2274_12	Galium californicum subsp. sierrae	Lazy Knoll	50	38.7294	-120.98	Female	11 May 2017
2274_2	Galium californicum subsp. sierrae	Lazy Knoll	5	38.7294	-120.98	Male	11 May 2017
2274_3	Galium californicum subsp. sierrae	Lazy Knoll	22	38.7294	-120.98	Female	11 May 2017
2274_4	Galium californicum subsp. sierrae	Lazy Knoll	23	38.7294	-120.98	Female	11 May 2017
2274_5	Galium californicum subsp. sierrae	Lazy Knoll	24	38.7294	-120.98	Female	11 May 2017
2274_6	Galium californicum subsp. sierrae	Lazy Knoll	31	38.7294	-120.98	Male	11 May 2017
2274_7	Galium californicum subsp. sierrae	Lazy Knoll	36	38.7294	-120.98	Female	11 May 2017
2274_8	Galium californicum subsp. sierrae	Lazy Knoll	37	38.7294	-120.98	Male	11 May 2017
2274_9	Galium californicum subsp. sierrae	Lazy Knoll	39	38.7294	-120.98	Male	11 May 2017
2275_1	Galium californicum subsp. sierrae	Salmon Falls	1	38.7629	-121.027	Male	12 May 2017
2275_10	Galium californicum subsp. sierrae	Salmon Falls	42	38.7629	-121.027	Female	12 May 2017
2275_11	Galium californicum subsp. sierrae	Salmon Falls	44	38.7629	-121.027	Female	12 May 2017
2275_12	Galium californicum subsp. sierrae	Salmon Falls	45	38.7629	-121.027	Female	12 May 2017
2275_2	Galium californicum subsp. sierrae	Salmon Falls	1	38.7629	-121.027	Male	12 May 2017
2275_3	Galium californicum subsp. sierrae	Salmon Falls	3	38.7629	-121.027	Male	12 May 2017
2275_4	Galium californicum subsp. sierrae	Salmon Falls	4	38.7629	-121.027	Male	12 May 2017
2275_5	Galium californicum subsp. sierrae	Salmon Falls	23	38.7629	-121.027	Male	12 May 2017
2275_6	Galium californicum subsp. sierrae	Salmon Falls	31	38.7629	-121.027	Male	12 May 2017
2275_7	Galium californicum subsp. sierrae	Salmon Falls	36	38.7629	-121.027	Male	12 May 2017
2275_8	Galium californicum subsp. sierrae	Salmon Falls	37	38.7629	-121.027	Male	12 May 2017
2275_9	Galium californicum subsp. sierrae	Salmon Falls	38	38.7629	-121.027	Male	12 May 2017
2281_1	Galium californicum subsp. sierrae	Many Oaks	9	38.6643	-120.95	Female	27 May 2017
2281_10	Galium californicum subsp. sierrae	Many Oaks	28	38.6643	-120.95	Unknown	27 May 2017
2281_11	Galium californicum subsp. sierrae	Many Oaks	41	38.6643	-120.95	Female	27 May 2017
2281_12	Galium californicum subsp. sierrae	Many Oaks	42	38.6643	-120.95	Unknown	27 May 2017
2281_2	Galium californicum subsp. sierrae	Many Oaks	9	38.6643	-120.95	Female	27 May 2017
2281_3	Galium californicum subsp. sierrae	Many Oaks	11	38.6643	-120.95	Female	27 May 2017
2281_4	Galium californicum subsp. sierrae	Many Oaks	12	38.6643	-120.95	Female	27 May 2017
2281_5	Galium californicum subsp. sierrae	Many Oaks	13	38.6643	-120.95	Female	27 May 2017
2281_6	Galium californicum subsp. sierrae	Many Oaks	17	38.6643	-120.95	Female	27 May 2017
2281_7	Galium californicum subsp. sierrae	Many Oaks	18	38.6643	-120.95	Female	27 May 2017
2281_8	Galium californicum subsp. sierrae	Many Oaks	20	38.6643	-120.95	Male	27 May 2017
2281_9	Galium californicum subsp. sierrae	Many Oaks	24	38.6643	-120.95	Female	27 May 2017
