# Supplementary material for: Conservation genomics and pollination biology of an endangered, edaphic-endemic, octoploid herb: El Dorado bedstraw (Galium californicum subsp. sierrae; Rubiaceae)
Source: PeerJ. 2020 Oct 26;8:e10042. doi: 10.7717/peerj.10042 (PMC7594638; doi:10.7717/peerj.10042)
Supplement: Supplemental Information 2 — Sequencing coverage data and GenBank accession numbers for all 82 samples of El Dorado bedstraw used in population genetic analyses. Excludes two plants removed due to excessive missing data (2275-2 and 2275-10); these were not used in any of the analyses. [file peerj-08-10042-s002.xlsx]

## Sheet: SUPPLEMENT S3
Code	NGS Reads	Biosample Accession
2260_1	4724352	SAMN09761881
2260_10	3614326	SAMN09761882
2260_11	4277346	SAMN09761883
2260_12	3737606	SAMN09761884
2260_2	5012760	SAMN09761885
2260_3	4747550	SAMN09761886
2260_4	4353794	SAMN09761887
2260_5	6207254	SAMN09761888
2260_6	3207420	SAMN09761889
2260_7	3269796	SAMN09761890
2260_8	3356580	SAMN09761891
2260_9	3472426	SAMN09761892
2263_1	4312596	SAMN09761893
2263_10	3577026	SAMN09761894
2263_11	3899034	SAMN09761895
2263_12	3399492	SAMN09761896
2263_2	5528128	SAMN09761897
2263_3	2785070	SAMN09761898
2263_4	4060994	SAMN09761899
2263_5	4833578	SAMN09761900
2263_6	3704122	SAMN09761901
2263_7	3824002	SAMN09761902
2263_8	4172566	SAMN09761903
2263_9	4437084	SAMN09761904
2264_1	2595514	SAMN09761905
2264_10	3441564	SAMN09761906
2264_11	2997956	SAMN09761907
2264_12	2972606	SAMN09761908
2264_2	3806476	SAMN09761909
2264_3	2719328	SAMN09761910
2264_4	2883928	SAMN09761911
2264_5	3568208	SAMN09761912
2264_6	5104220	SAMN09761913
2264_7	2982244	SAMN09761914
2264_8	4039444	SAMN09761915
2264_9	2539068	SAMN09761916
2272_1	2518778	SAMN09761917
2272_10	3247680	SAMN09761918
2272_11	1854678	SAMN09761919
2272_12	1657778	SAMN09761920
2272_2	3704314	SAMN09761921
2272_3	2644082	SAMN09761922
2272_4	2811292	SAMN09761923
2272_5	3419478	SAMN09761924
2272_6	2460546	SAMN09761925
2272_7	4383990	SAMN09761926
2272_8	3192780	SAMN09761927
2272_9	2320968	SAMN09761928
2274_1	1435758	SAMN09761929
2274_10	2824418	SAMN09761930
2274_11	2258878	SAMN09761931
2274_12	3221294	SAMN09761932
2274_2	2305862	SAMN09761933
2274_3	2735076	SAMN09761934
2274_4	2013414	SAMN09761935
2274_5	2717540	SAMN09761936
2274_6	2135720	SAMN09761937
2274_7	2229884	SAMN09761938
2274_8	1797682	SAMN09761939
2274_9	2835532	SAMN09761940
2275_1	2221362	SAMN09761941
2275_11	1819658	SAMN09761943
2275_12	1712658	SAMN09761944
2275_3	3926484	SAMN09761946
2275_4	1248344	SAMN09761947
2275_5	2599388	SAMN09761948
2275_6	3563040	SAMN09761949
2275_7	1341814	SAMN09761950
2275_8	1894750	SAMN09761951
2275_9	3342524	SAMN09761952
2281_1	2869772	SAMN09761953
2281_10	2751486	SAMN09761954
2281_11	2384086	SAMN09761955
2281_12	4523590	SAMN09761956
2281_2	2240842	SAMN09761957
2281_3	1613738	SAMN09761958
2281_4	1587514	SAMN09761959
2281_5	2097244	SAMN09761960
2281_6	3323782	SAMN09761961
2281_7	2434646	SAMN09761962
2281_8	1004138	SAMN09761963
2281_9	3007352	SAMN09761964
