# Supplementary material for: Conservation genomics and pollination biology of an endangered, edaphic-endemic, octoploid herb: El Dorado bedstraw (Galium californicum subsp. sierrae; Rubiaceae)
Source: PeerJ. 2020 Oct 26;8:e10042. doi: 10.7717/peerj.10042 (PMC7594638; doi:10.7717/peerj.10042)
Supplement: Supplemental Information 3 — Calculated using the R package adegenet, version 1.3-1 (Jombart & Ahmed, 2011). [file peerj-08-10042-s003.xlsx]

## Sheet: Appendix_S5
Fst
	2260	2263	2264	2272	2274	2275
2263	0.0452874
2264	0.047994	0.0503001
2272	0.0417927	0.0438402	0.0458366
2274	0.0456161	0.0474899	0.0485748	0.0437659
2275	0.0478708	0.0529328	0.0536849	0.0450486	0.0483976
2281	0.0530258	0.0555823	0.0603112	0.0527564	0.0555351	0.0596994
